# Supplementary material for: Electrochemical Bottom-Up Synthesis of Chiral Carbon Dots from L-Proline and Their Application as Nano-Organocatalysts in a Stereoselective Aldol Reaction
Source: MDPI journal article supplement (doi:10.3390/molecules27165150), 2022-08-12
Supplement: s1 [file s1]

**Electrochemical bottom-up synthesis of Chiral Carbon Dots and their application as Nano-Organocatalysts in a stereoselective Mannich reaction in water**

Martina Bortolami,<sup>1</sup> Ingrid Izabela Bogles,<sup>1</sup> Cecilia Bombelli,<sup>2</sup> Fabiana Pandolfi,<sup>1,2</sup> Marta Feroci,<sup>1,\*</sup> and Fabrizio Vetica<sup>3,\*</sup>

<sup>1</sup>*Department of Basic and Applied Sciences for Engineering (SBAI), Sapienza University of Rome, via Castro Laurenziano, 7, 00161 Rome (Italy).*

<sup>2</sup>*Institute of Biological Systems (ISB), Italian National Research Council (CNR), Sezione Meccanismi di Reazione, Piazzale Aldo Moro 5, 00185 Rome, Italy.*

<sup>3</sup>*Department of Chemistry, Sapienza University of Rome, piazzale Aldo Moro, 5, 00185 Rome (Italy).*

**Table of Contents**

|                                                    |          |
|----------------------------------------------------|----------|
| <b>Energy Dispersive X-ray (EDX) analysis.....</b> | <b>2</b> |
| <b>NMR SPECTRA .....</b>                           | <b>3</b> |
| <b>HPLC DATA.....</b>                              | <b>7</b> |

## Energy Dispersive X-ray (EDX) analysis

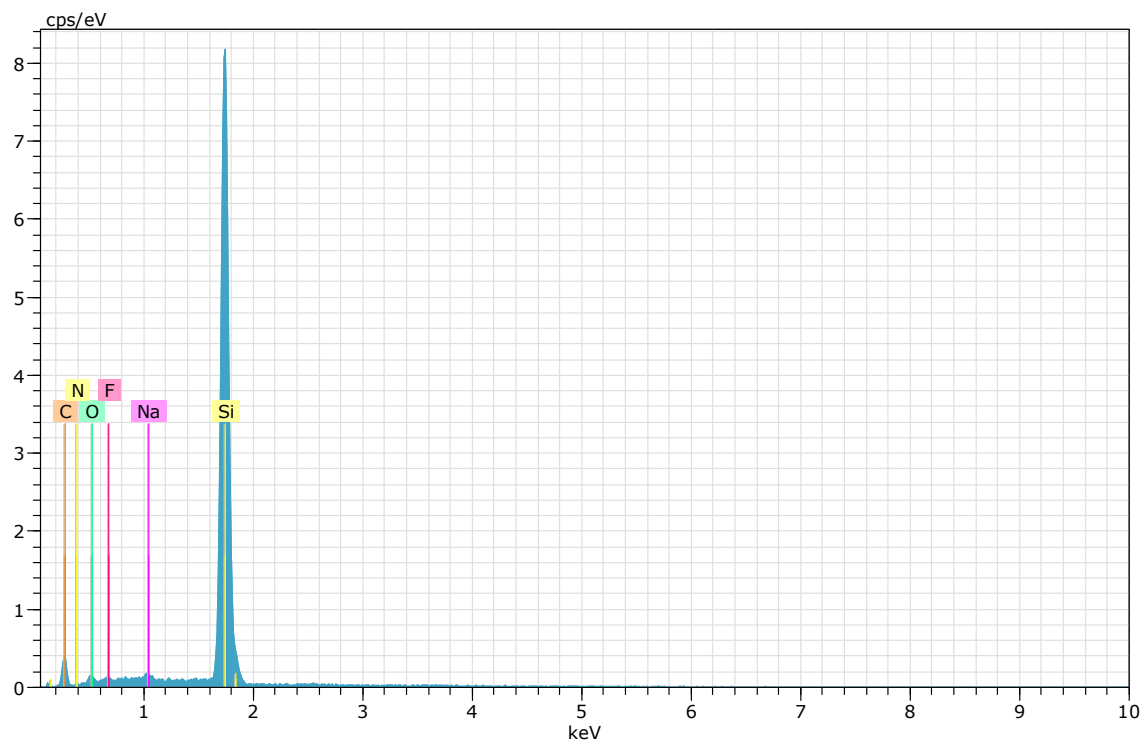

Spectrum: CD101\_ 3

| Element  | Series   | unn. C<br>[wt.%] | norm. C<br>[wt.%] | Atom. C<br>[at.%] | Error (1 Sigma)<br>[wt.%] |
|----------|----------|------------------|-------------------|-------------------|---------------------------|
| Silicon  | K-series | 0.00             | 0.00              | 0.00              | 0.00                      |
| Carbon   | K-series | 1.11             | 45.01             | 54.37             | 0.30                      |
| Oxygen   | K-series | 0.68             | 27.38             | 24.83             | 0.24                      |
| Fluorine | K-series | 0.31             | 12.52             | 9.56              | 0.15                      |
| Sodium   | K-series | 0.27             | 10.89             | 6.87              | 0.05                      |
| Nitrogen | K-series | 0.10             | 4.21              | 4.36              | 0.12                      |
| Total:   |          | 2.47             | 100.00            | 100.00            |                           |

# NMR SPECTRA

## (S)-2-((R)-hydroxy(4-nitrophenyl)methyl)cyclohexan-1-one (3a)

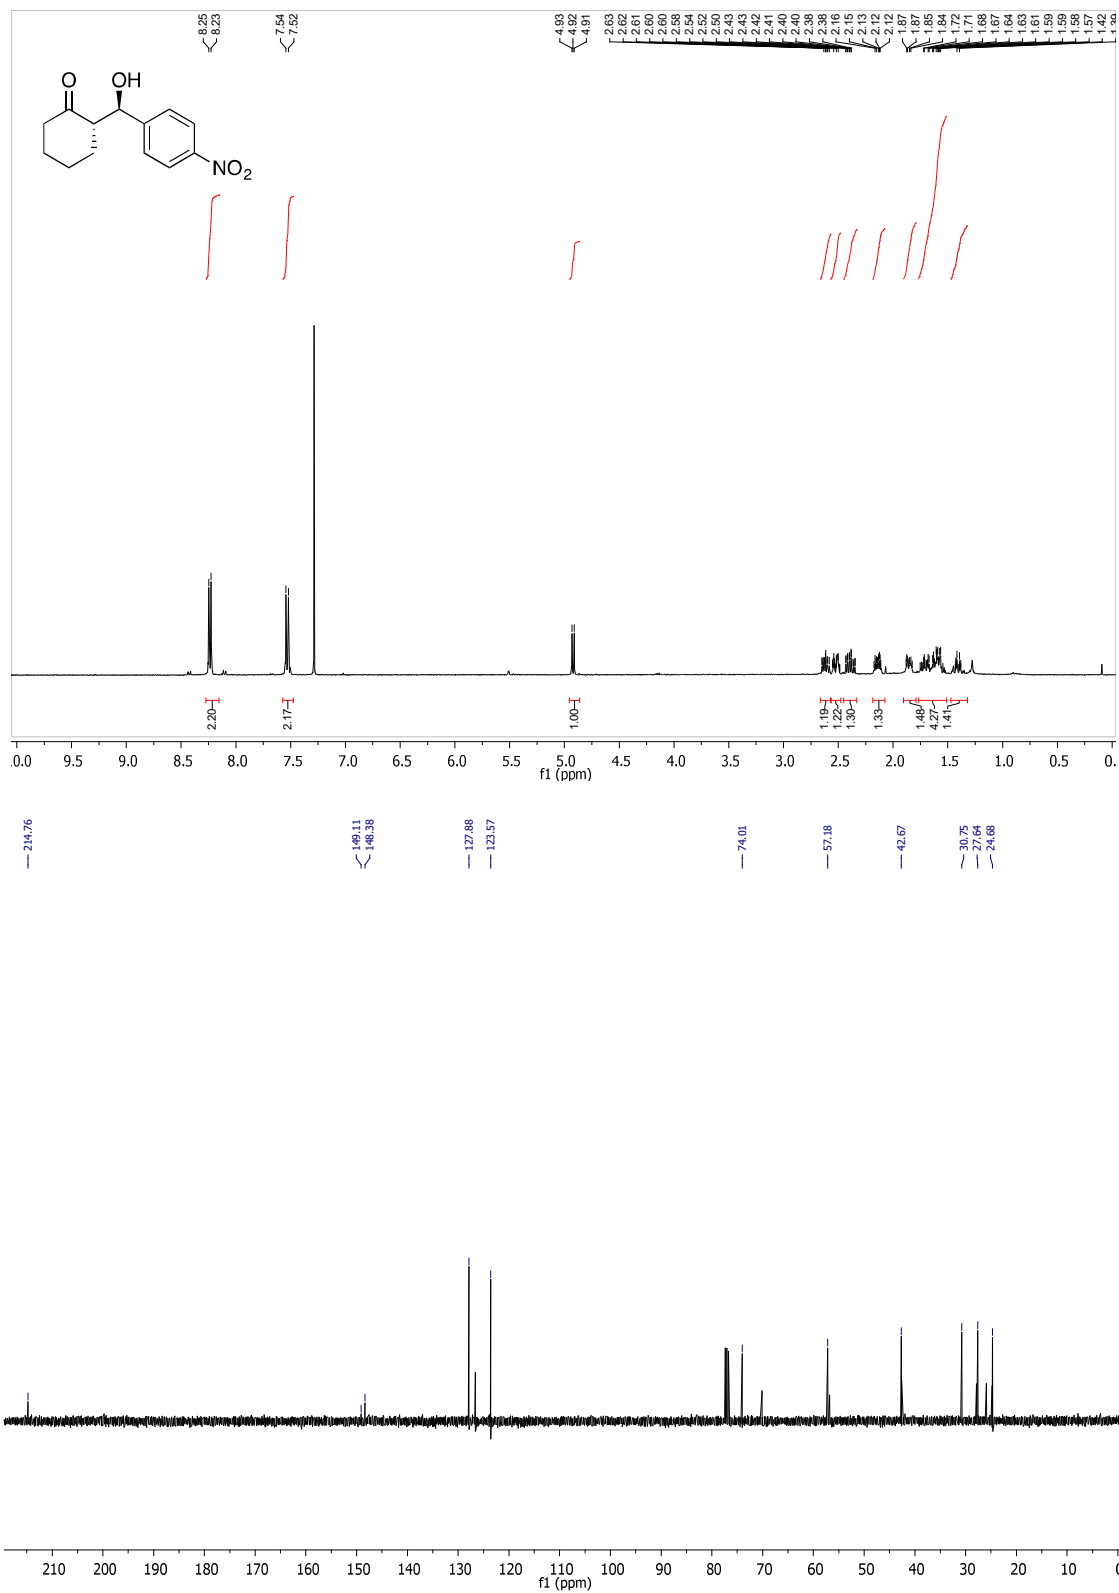

***(S)*-2-((*R*)-hydroxy(3-nitrophenyl)methyl)cyclohexan-1-one (3b)**

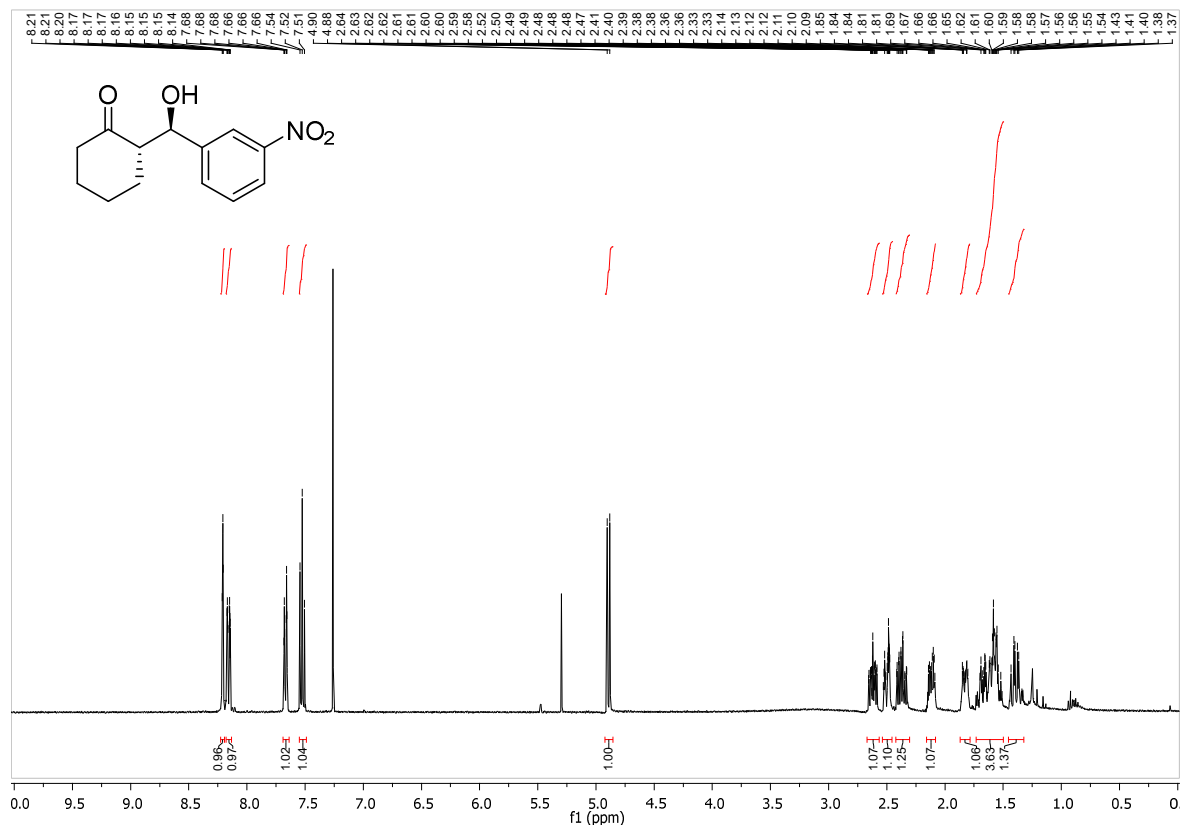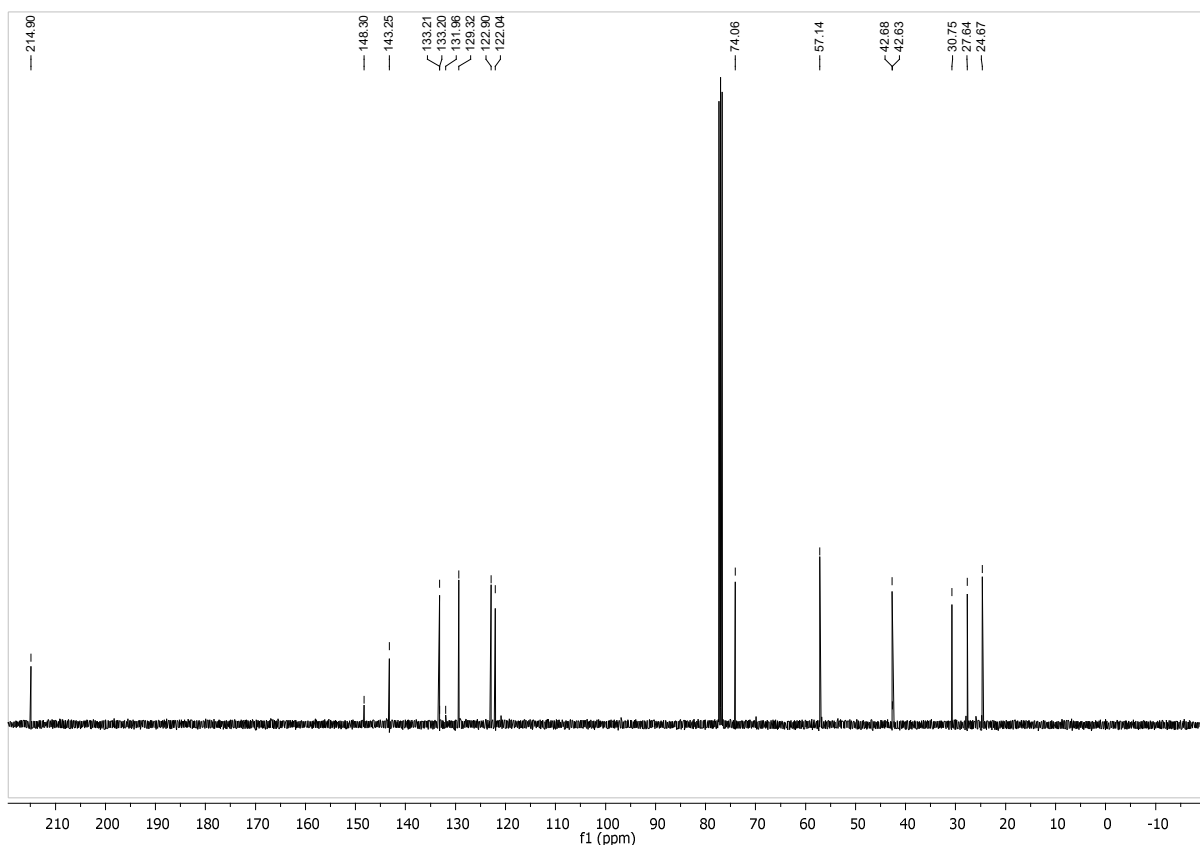

**(S)-2-((R)-(2-chlorophenyl)(hydroxy)methyl)cyclohexan-1-one (3c)**

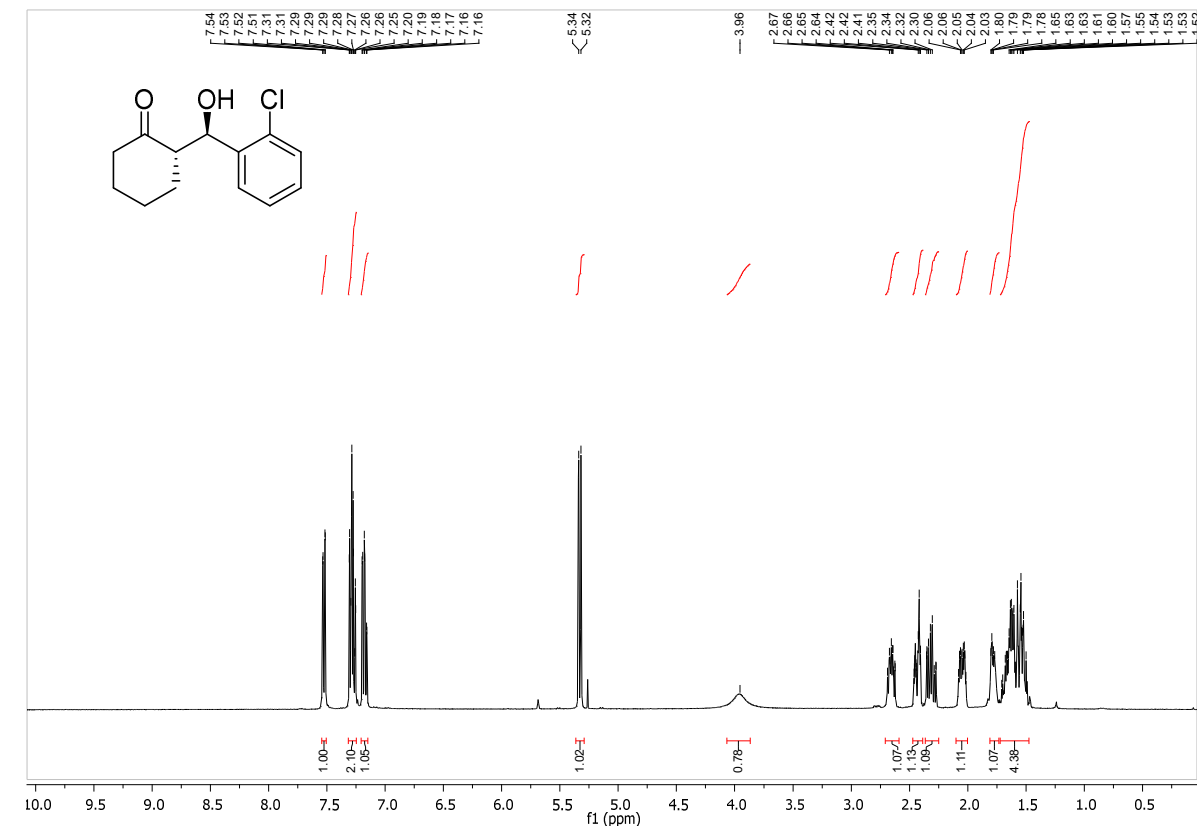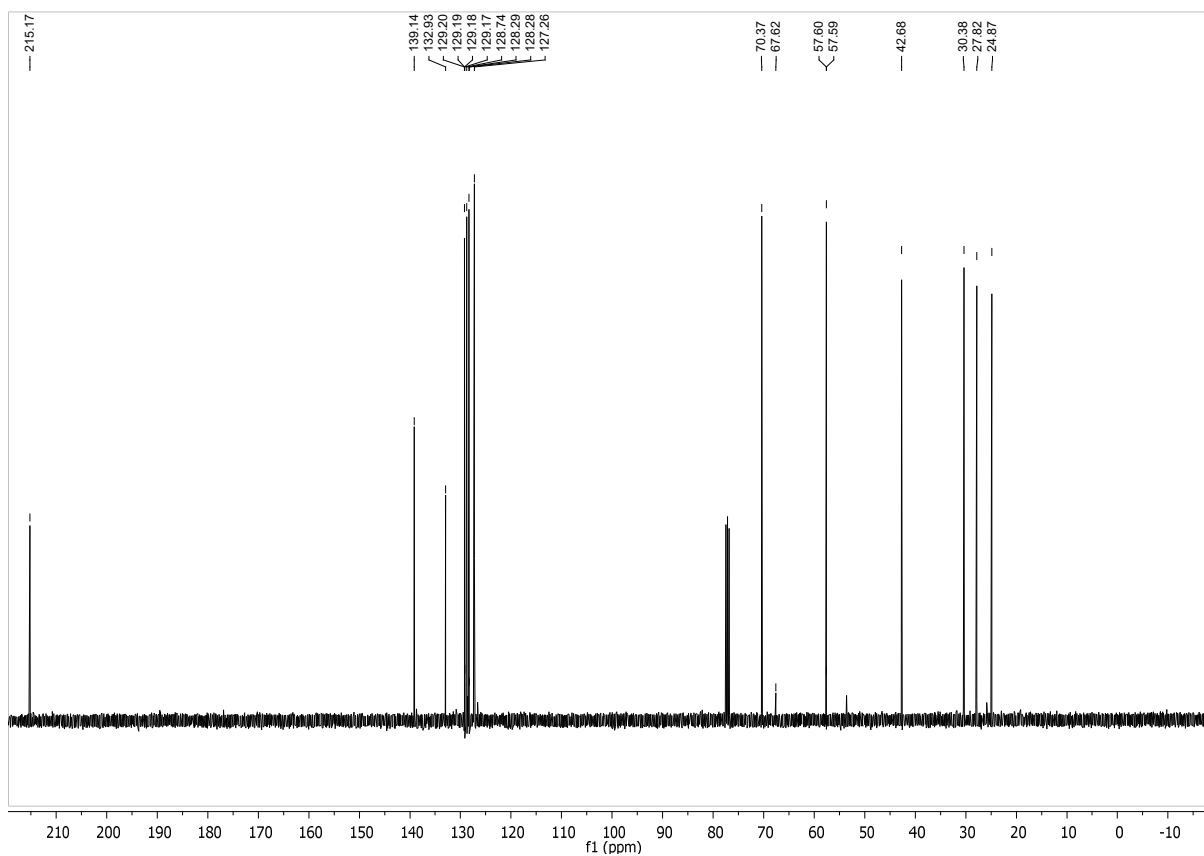

**(S)-2-((R)-(4-bromophenyl)(hydroxy)methyl)cyclohexan-1-one (3d)**

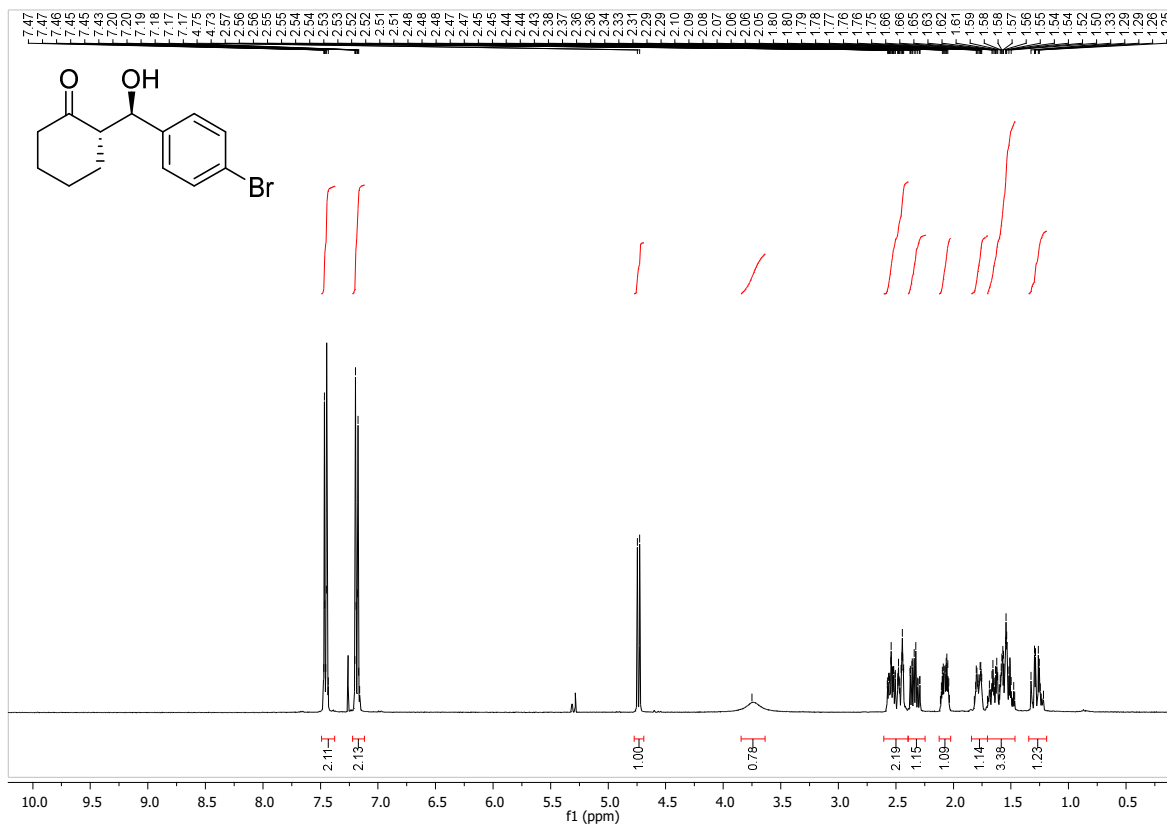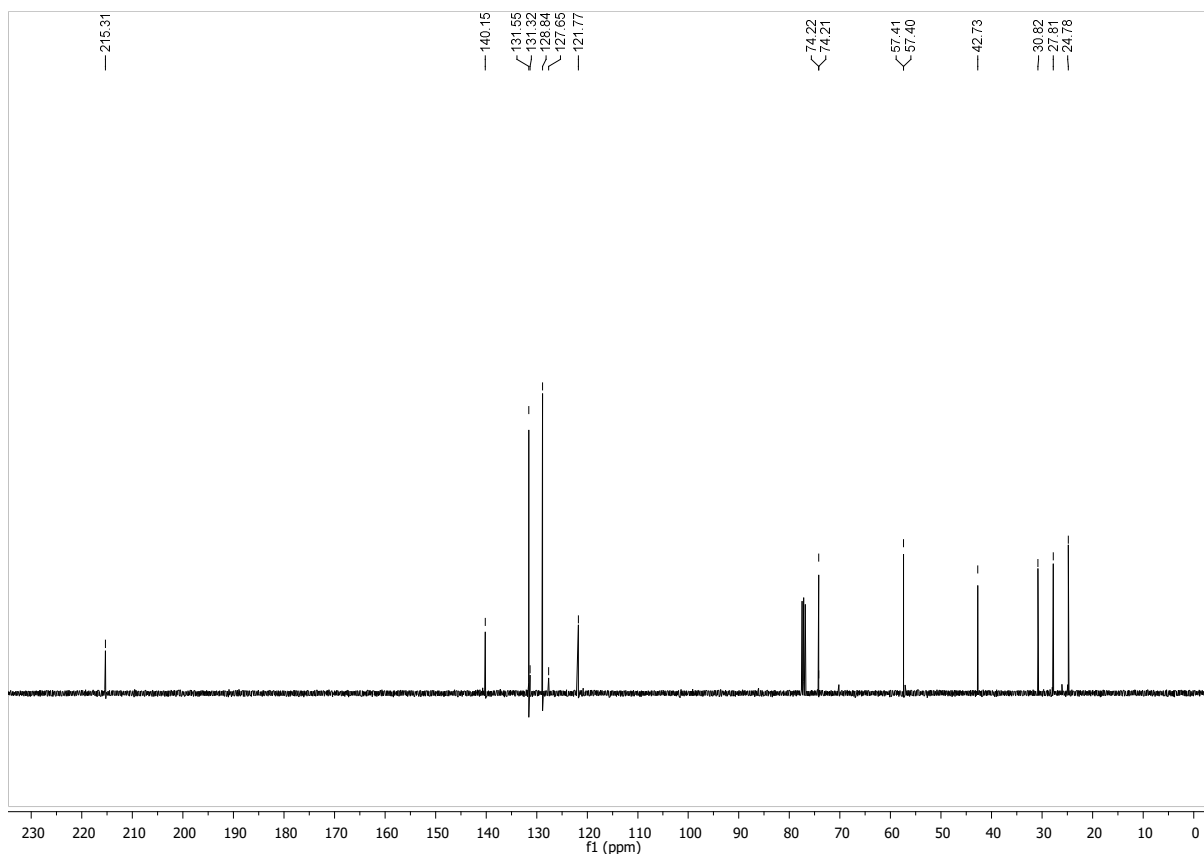

## HPLC DATA

*(S)*-2-((*R*)-hydroxy(4-nitrophenyl)methyl)cyclohexan-1-one (*X*)

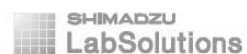

## Analysis Report

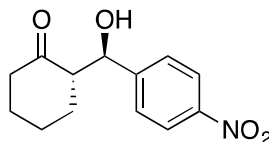

### <Sample Information>

Sample Name : CD65  
Sample ID : CD65  
Data Filename : CD65.lcd  
Method Filename : H-PrOH\_95-5\_1mlmin.lcm  
Batch Filename :  
Vial # : 1-1  
Injection Volume : 1 uL  
Date Acquired : 17/03/2022 17:09:44  
Date Processed : 17/03/2022 17:58:10

Sample Type : Unknown  
Acquired by : System Administrator  
Processed by : System Administrator

### <Chromatogram>

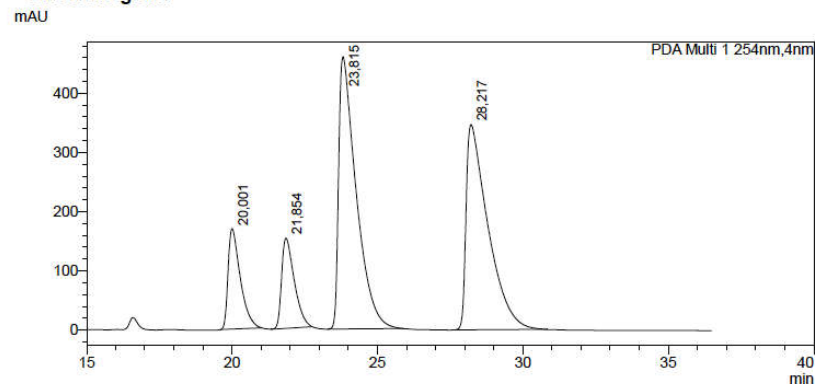

### <Peak Table>

PDA Ch1 254nm

| Peak# | Ret. Time | Area     | Height  | Area%   |
|-------|-----------|----------|---------|---------|
| 1     | 20.001    | 4950415  | 169548  | 10.548  |
| 2     | 21.854    | 4598570  | 152293  | 9.799   |
| 3     | 23.815    | 19254976 | 459733  | 41.029  |
| 4     | 28.217    | 18126578 | 346597  | 38.624  |
| Total |           | 46930538 | 1128171 | 100.000 |

### <Sample Information>

Sample Name : CD 103  
Sample ID : CD 103  
Data Filename : CD 103.lcd  
Method Filename : Hex\_iPro\_95\_5.lcm  
Batch Filename :  
Vial # : 1-1  
Injection Volume : 1 uL  
Date Acquired : 30/06/2022 14:51:05  
Date Processed : 01/07/2022 13:31:13

Sample Type : Unknown  
Acquired by : System Administrator  
Processed by : System Administrator

### <Chromatogram>

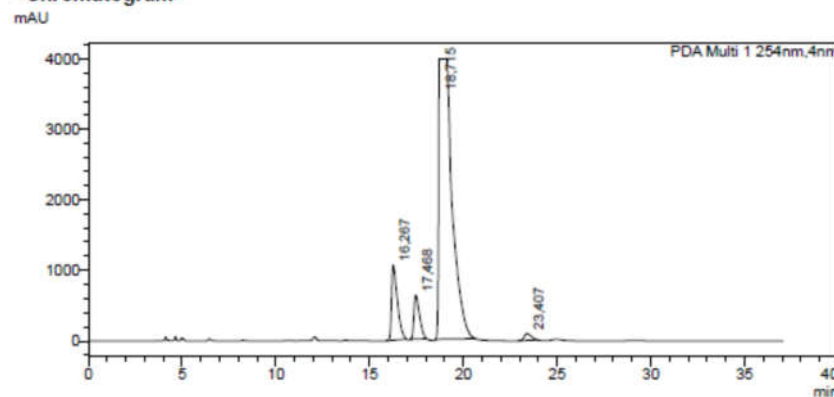

### <Peak Table>

PDA Ch1 254nm

| Peak# | Ret. Time | Area      | Height  | Area%   |
|-------|-----------|-----------|---------|---------|
| 1     | 16.267    | 22864421  | 1059916 | 9.767   |
| 2     | 17.468    | 12910651  | 622412  | 5.515   |
| 3     | 18.715    | 195899067 | 3975108 | 83.680  |
| 4     | 23.407    | 2430270   | 94067   | 1.038   |
| Total |           | 234104409 | 5751503 | 100.000 |

**(S)-2-((R)-hydroxy(3-nitrophenyl)methyl)cyclohexan-1-one (3b)**

**<Sample Information>**

Sample Name : CD 113 con C4D6 0,5  
 Sample ID : CD 113 con C4D6 0,5  
 Data Filename : CD 113 con C4D6 0,5.lcd  
 Method Filename : Hex\_iPro\_95\_5.lcm  
 Batch Filename :  
 Vial # : 1-1  
 Injection Volume : 1 uL  
 Date Acquired : 20/07/2022 13:17:02  
 Date Processed : 20/07/2022 17:47:50

Sample Type : Unknown

Acquired by : System Administrator  
 Processed by : System Administrator

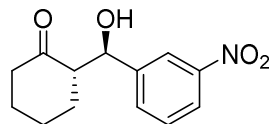

**<Chromatogram>**

mAU

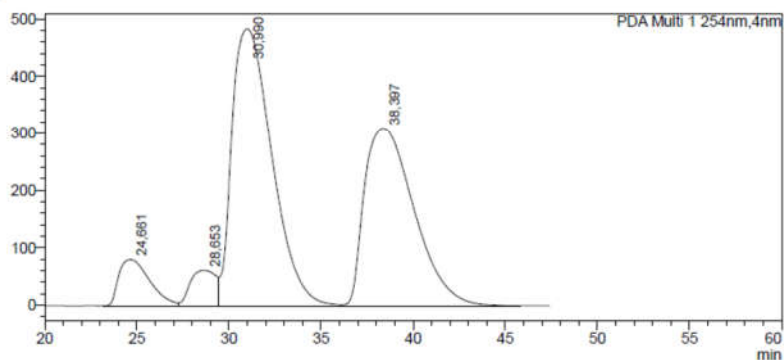

**<Peak Table>**

| PDA Ch1 254nm |           |           |        |         |
|---------------|-----------|-----------|--------|---------|
| Peak#         | Ret. Time | Area      | Height | Area%   |
| 1             | 24.661    | 9396329   | 80658  | 6.413   |
| 2             | 28.653    | 5950630   | 61819  | 4.061   |
| 3             | 30.990    | 73076041  | 483790 | 49.874  |
| 4             | 38.397    | 58097332  | 309518 | 39.651  |
| Total         |           | 146520332 | 935785 | 100,000 |

**<Sample Information>**

Sample Name : CD 112 0,5 p2  
 Sample ID : CD 112 0,5 p2  
 Data Filename : CD 112 chiral 0,5 p2.lcd  
 Method Filename : Hex\_iPro\_95\_5.lcm  
 Batch Filename :  
 Vial # : 1-1  
 Injection Volume : 1 uL  
 Date Acquired : 20/07/2022 15:12:14  
 Date Processed : 20/07/2022 15:57:06

Sample Type : Unknown

Acquired by : System Administrator  
 Processed by : System Administrator

**<Chromatogram>**

uAU

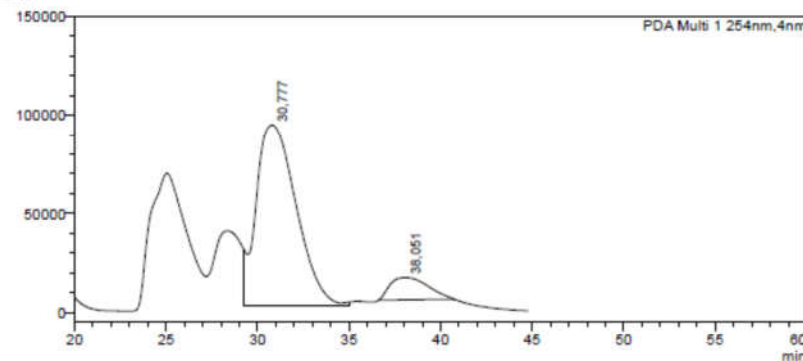

**<Peak Table>**

| PDA Ch1 254nm |           |          |        |
|---------------|-----------|----------|--------|
| Peak#         | Ret. Time | Area     | Height |
| 1             | 30.777    | 14003083 | 91706  |
| 2             | 38.051    | 1630231  | 11252  |
| Total         |           | 15633313 | 102958 |



**(S)-2-((R)-(2-chlorophenyl)(hydroxy)methyl)cyclohexan-1-one (3c)**

**<Sample Information>**

Sample Name : CD115  
 Sample ID : CD115  
 Data Filename : CD115.lcd  
 Method Filename : Hex\_iPro\_95\_5.lcm  
 Batch Filename :  
 Vial # : 1-1  
 Injection Volume : 1 uL  
 Date Acquired : 18/07/2022 15:04:15  
 Date Processed : 18/07/2022 15:40:59  
 Sample Type : Unknown  
 Acquired by : System Administrator  
 Processed by : System Administrator

**<Chromatogram>**

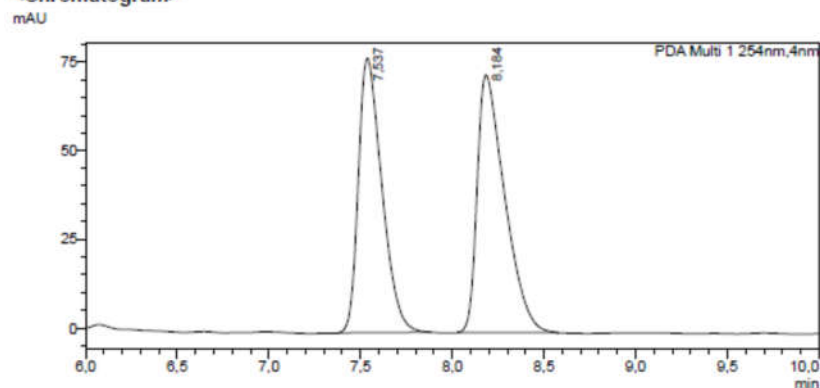

**<Peak Table>**

| PDA Ch1 254nm |           |         |        |         |
|---------------|-----------|---------|--------|---------|
| Peak#         | Ret. Time | Area    | Height | Area%   |
| 1             | 7.537     | 692475  | 77270  | 47.779  |
| 2             | 8.184     | 756865  | 72722  | 52.221  |
| Total         |           | 1449339 | 149992 | 100.000 |

**<Sample Information>**

Sample Name : CD114  
 Sample ID : CD114  
 Data Filename : CD114.lcd  
 Method Filename : Hex\_iPro\_95\_5.lcm  
 Batch Filename :  
 Vial # : 1-1  
 Injection Volume : 1 uL  
 Date Acquired : 18/07/2022 15:22:09  
 Date Processed : 18/07/2022 15:39:00  
 Sample Type : Unknown  
 Acquired by : System Administrator  
 Processed by : System Administrator

**<Chromatogram>**

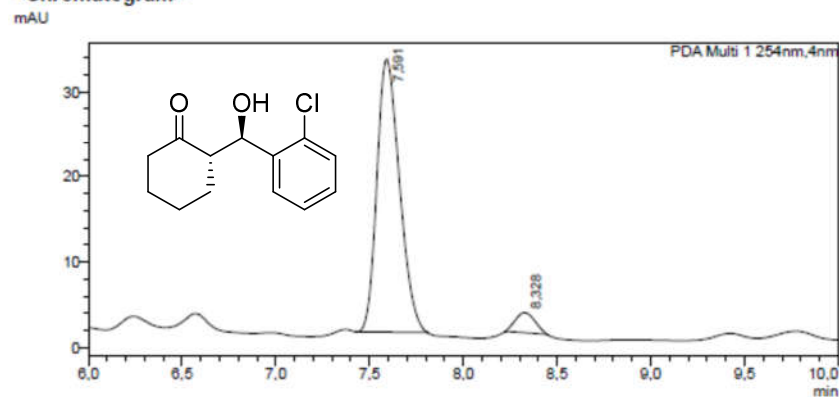

**<Peak Table>**

| PDA Ch1 254nm |           |        |        |         |
|---------------|-----------|--------|--------|---------|
| Peak#         | Ret. Time | Area   | Height | Area%   |
| 1             | 7.591     | 268441 | 32012  | 94.017  |
| 2             | 8.328     | 17083  | 2350   | 5.983   |
| Total         |           | 285523 | 34362  | 100.000 |

**(S)-2-((R)-(4-bromophenyl)(hydroxy)methyl)cyclohexan-1-one (3d)**

**<Sample Information>**

Sample Name : CD 120COL  
 Sample ID : CD 120COL  
 Data Filename : CD 120COL.lcd  
 Method Filename : Hex\_iPro\_95\_5.lcm  
 Batch Filename :  
 Vial # : 1-1  
 Injection Volume : 1 uL  
 Date Acquired : 25/07/2022 13:23:58  
 Date Processed : 25/07/2022 15:11:34

Sample Type : Unknown

Acquired by : System Administrator  
 Processed by : System Administrator

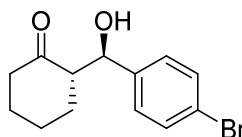

**<Chromatogram>**

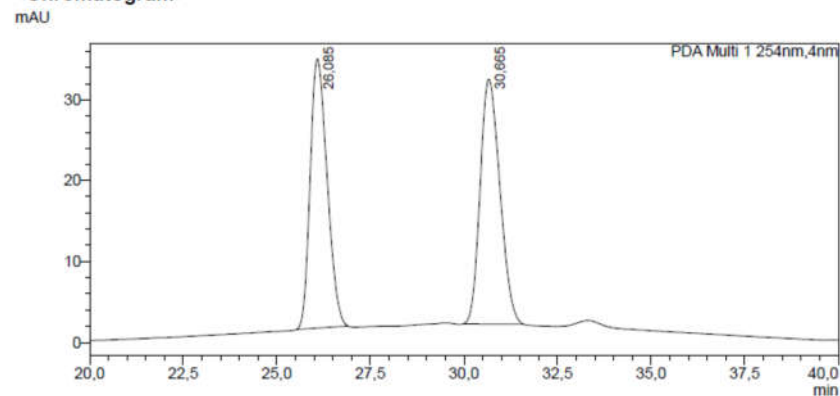

**<Peak Table>**

| Peak# | Ret. Time | Area    | Height | Area%   |
|-------|-----------|---------|--------|---------|
| 1     | 26.085    | 1046305 | 33285  | 48.548  |
| 2     | 30.665    | 1108904 | 30281  | 51.452  |
| Total |           | 2155209 | 63566  | 100.000 |

**<Sample Information>**

Sample Name : CD 119EST chir  
 Sample ID : CD 119EST chir  
 Data Filename : CD 119EST chir.lcd  
 Method Filename : Hex\_iPro\_95\_5.lcm  
 Batch Filename :  
 Vial # : 1-1  
 Injection Volume : 1 uL  
 Date Acquired : 25/07/2022 14:06:54  
 Date Processed : 25/07/2022 15:15:26

Sample Type : Unknown

Acquired by : System Administrator  
 Processed by : System Administrator

**<Chromatogram>**

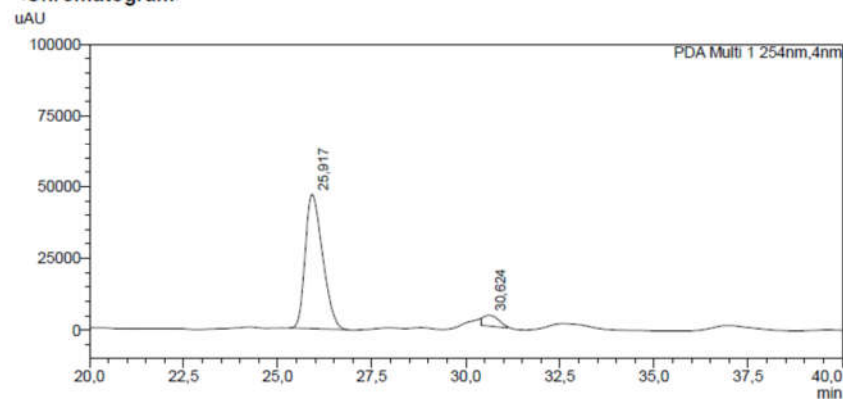

**<Peak Table>**

| Peak# | Ret. Time | Area    | Height | Area%   |
|-------|-----------|---------|--------|---------|
| 1     | 25.917    | 1504360 | 46681  | 93.324  |
| 2     | 30.624    | 107616  | 3777   | 6.676   |
| Total |           | 1611976 | 50458  | 100.000 |
